# Supplementary material for: Smartphone Apps for Smoking Cessation: Systematic Framework for App Review and Analysis
Source: PubMed Central journal article supplement (PMC10375280; doi:10.2196/45183), 2023-07-13
Supplement: jmir_v25i1e45183_app2.pdf [file jmir_v25i1e45183_app2.pdf]

## Appendix 1

| App Name 2021 data (N=228)                      | App Name 2022 data (N=180)                      |
|-------------------------------------------------|-------------------------------------------------|
| Adiquit: Quit Smoking                           | A New Pair of Glasses 12 Steps                  |
| Aeris: Quit Smoking & Vaping - Free Tracker App | Adiquit: Quit smoking                           |
| Alex AI - Quit Smoking                          | Aeris: Quit Smoking & Vaping - Free Tracker App |
| AshTray - Cigarette Counter                     | Alanon Workshops AA 12 Steps                    |
| Beat Smoking - Quit Smoking                     | Alex AI -Quit smoking                           |
| Break Free Rocket                               | appy - stay sober today                         |
| Break if Off - Quit Smoking                     | AshTray - Cigarette Counter                     |
| Breathe Easy Smoking Cessation                  | Beat Smoking - Quit Smoking                     |
| Breathe Now - Stop smoking                      | Become a non-smoker now                         |
| Butt Out Quit Smoking Forever                   | Benji Â· Quit Habits Tracker                    |
| Chantix - Quit Smoking                          | Breathe Easy Smoking Cessation                  |
| Cigano: Quit Smoking Challenge                  | Breathe Now - Stop smoking                      |
| Cigared - Smoke Counter                         | Butt Out Quit Smoking Forever                   |
| Cigarette Analytics                             | Chantix - Quit smoking                          |
| Cigarette Book                                  | Cigano: Quit Smoking Challenge                  |
| Cigarette Calculator                            | Cigarette Analytics                             |
| Cigarette Control & Counter                     | Cigarette Book                                  |
| Cigarette Count                                 | Cigarette calculator                            |
| Cigarette Counter                               | Cigarette Control & Counter                     |
| Cigarette counter                               | Cigarette Count                                 |
| Cigarette Counter - How much do you smoke?      | Cigarette Counter                               |
| Cigarette Counter / Quit Smoking / Don't smoke  | Cigarette counter                               |
| Cigarette Counter and Tracker                   | Cigarette Counter - How much do you smoke?      |
| Cigarette Counter Lite - How much do you smoke? | Cigarette Counter and Tracker                   |
| Cigarette Tracker App                           | Cigarette Counter Lite - How much do you smoke? |
| Cigarettes Control (Pro)                        | Cigarette Tracker App                           |
| Cigarettes Counter                              | Cigarettes Control (Pro)                        |
| Cigarettes Lite                                 | CiggyCount - Watch your smokes                  |
| CiggyCount - Watch your smokes                  | Cigs Counter                                    |
| Cigs Counter                                    | Cigs Counter - Quit Smoking                     |
| Cigs Counter - Quit Smoking                     | Clean Day - Sobriety Counter                    |
| Clean Time App                                  | Counter Tally Count                             |
| Coffee & cigarettes                             | *Craving To Quit!                               |
| Count my cigarettes                             | Darth Vaper                                     |
| Counter – Tally Counter                         | Days Since: Quit Habit Tracker                  |
| *Craving To Quit!                               | DipQuit Pro: Quit Dipping Smokeless Tobacco     |
| Darth Vaper                                     | Done: A Simple Habit Tracker                    |
| Days Since: Quit Habit Tracker                  | Don't Smoke: 30 Days Challenge                  |

|                                                                     |                                                    |
|---------------------------------------------------------------------|----------------------------------------------------|
| Dependn' – Quit weed, tobacco and alcohol – Stop drinking & smoking | Drop It! Quit Smoking                              |
| Done: A Simple Habit Tracker                                        | DWS: Smoke-free counter                            |
| Don't Smoke: 30 Days Challenge                                      | Easy Quit Smoking & Vaping                         |
| Drop it! Quit Smoking                                               | Empowered Hypnosis for Alcoholism & Addiction      |
| DWS: Smoke-free counter / Quit Smoking Now                          | Enjoy! Quit Smoking                                |
| Easy Quit Smoking & Vaping                                          | ExSmoker – Stop Smoking Now                        |
| Easy Way to stop smoking                                            | Flamy – quit smoking                               |
| Enjoy! Quit Smoking                                                 | Fumolite                                           |
| ExSmoker – Stop Smoking Now                                         | Get Rich or Die Smoking Gold                       |
| Flamy – quit smoking & become a non-smoker                          | Habit Tracker ++                                   |
| Fumolite                                                            | Hypnosis for Quit Smoking                          |
| Get Rich or Die Smoking Gold                                        | I Can – Sober Counter                              |
| Habit Tracker ++                                                    | I Give Up Smoking                                  |
| Healthy Quit                                                        | IcanCaRe – Online Tobacco Wellness App             |
| How to Quit Smoking Breaking Bad Habits                             | ISMOKAY – QUIT SMOKING                             |
| HypnoCloud   Hypnotherapy App                                       | iSmoke2Much                                        |
| Hypnomatic — mobile hypnosis                                        | JustQuit: Tracker for Recovery                     |
| Hypnosis for Quitting Smoking Guide Free                            | *Kwit - Quit smoking for good!                     |
| I Am Sober                                                          | Last : Track Time Passed Since                     |
| I Can – Sober Counter                                               | Last Cigarette                                     |
| I Give Up Smoking                                                   | LIVESTRONG MyQuit Coach                            |
| ICanCaRe - Online Tobacco Wellness App                              | My Last Cigarette                                  |
| ISMOKAY - QUIT SMOKING                                              | My last Cigarette Timer                            |
| iSmoke2Much                                                         | Never Better                                       |
| KickSmoke: quit smoking now!                                        | No Smoking                                         |
| *Kwit - Quit Smoking for good!                                      | No-Cotine! Quit smoking                            |
| Last : Track Time Passed Since                                      | nomo - Sobriety Clocks                             |
| Last Cigarette                                                      | NoSmokingWatch-Decided version of non-smoking app! |
| Last Cigarette                                                      | Puff Count                                         |
| LIVESTRONG MyQuit Coach                                             | Quit Anything - X days since                       |
| My Last Cigarette                                                   | Quit Cigs, Smoking, & Tobacco - Quit Smoking Now   |
| My last Cigarette Timer                                             | Quit It - stop smoking today                       |
| MyQuit                                                              | Quit it - stop smoking today                       |
| No Smoking                                                          | *Quit Now: My QuitBuddy                            |
| No Smoking - The Best App to Quit Smoking                           | Quit Right - Quit Smoking Now - Stop Smoking       |
| No-Cotine! Quit Smoking                                             | Quit Smoking                                       |
| Nomo - Sobriety Clocks                                              | Quit Smoking                                       |
| NoSmokingWatch-Decided version of non-smoking app                   | Quit smoking                                       |
| Productive - Habit Tracker                                          | Quit Smoking                                       |

|                                                                 |                                                   |
|-----------------------------------------------------------------|---------------------------------------------------|
| Queste: quit smoking now                                        | Quit Smoking - Get Smoke Free                     |
| Quit Cigs, Smoking, & Tobacco - Quit Smoking Now                | *Quit Smoking - MindCotine                        |
| Quit For Health                                                 | Quit Smoking - Premium Subliminal Messages        |
| Quit it - stop smoking today                                    | Quit smoking - Smokerstop                         |
| Quit It - stop smoking today                                    | Quit Smoking - Stop Smoking Counter               |
| Quit My Way                                                     | Quit Smoking - Stop Smoking Now                   |
| *Quit Now: My QuitBuddy                                         | Quit Smoking - Stop Smoking without any medicine  |
| Quit Pro                                                        | Quit Smoking - We are your motivation             |
| Quit Right - Quit Smoking Now - Stop Smoking                    | Quit Smoking (Lite)                               |
| Quit Smoking                                                    | Quit Smoking                                      |
| Quit Smoking                                                    | Quit Smoking Audiobook                            |
| Quit Smoking                                                    | Quit smoking cigarettes with Smokler              |
| Quit Smoking                                                    | Quit Smoking Get Healthy                          |
| Quit Smoking                                                    | Quit Smoking Hypnosis - Stop Smoking Hypnotherapy |
| Quit Smoking                                                    | Quit smoking in 101 days                          |
| quit smoking                                                    | Quit Smoking -No smoking day                      |
| Quit Smoking - Get Smoke Free                                   | *Quit Smoking NOW - Max Kirsten                   |
| *Quit Smoking - MindCotine                                      | Quit smoking now! - Tobakko                       |
| Quit Smoking - No smoking day                                   | Quit Smoking Now: Quit Buddy!                     |
| Quit Smoking - Premium Subliminal Messages                      | Quit Smoking Slowly - Gradually                   |
| Quit Smoking - Smokerstop                                       | Quit Smoking Timer - Smoke less, quit your habit! |
| Quit Smoking - Stop Smoking Counter                             | Quit Smoking Today - quitcy                       |
| Quit Smoking - Stop Smoking Now                                 | Quit Smoking Tracker                              |
| Quit Smoking - Stop Smoking without any medicine (Early Access) | Quit Smoking Tracker                              |
| Quit Smoking - Stop Tobacco Mobile Trainer                      | Quit Smoking Tracker GOLD - stop smoking app      |
| Quit Smoking - We are your motivation                           | Quit Smoking Virtual                              |
| Quit Smoking (Lite)                                             | Quit Smoking with AJ                              |
| Quit Smoking --~                                                | Quit Smoking with Andrew Johnson                  |
| Quit Smoking 30 days Plan: Stop Smoking Tracker                 | Quit Smoking With Hypnosis                        |
| Quit Smoking Affirmations                                       | Quit smoking with Quitify PRO                     |
| Quit Smoking Audiobook                                          | Quit Smoking, Be Smoke Free                       |
| Quit Smoking Cigarettes with Smokler                            | Quit Smoking-App : Stop Smoking Cigarettes        |
| Quit Smoking Forever - EFT                                      | Quit Tobacco                                      |
| Quit Smoking Get Healthy                                        | Quit Tracker: Stop Smoking                        |
| Quit Smoking Hypnosis - Stop Smoking Hypnotherapy               | Quit Vaping                                       |
| Quit Smoking in 101 days                                        | Quit: Hypnosis Program to Stop Smoking            |
| Quit Smoking in 28 Days Audio Program                           | *QuitGuide - Quit Smoking                         |
| *Quit Smoking NOW - Max Kirsten                                 | QuitNow: Quit smoking for good                    |

|                                                   |                                                    |
|---------------------------------------------------|----------------------------------------------------|
| Quit smoking now – smoke free                     | Quitsmoke - Easily stop smoking                    |
| Quit Smoking Now: Quit Buddy                      | QuitSmoke - Quit Smoking Now                       |
| Quit Smoking Pro                                  | *quitSTART - Quit Smoking                          |
| Quit Smoking Self Hypnosis                        | QuitSure: Quit Smoking Smartly                     |
| Quit Smoking Slowly - Gradually                   | Quitter - Daily Habit Tracker                      |
| Quit Smoking Timer - Smoke less, quit your habit! | Quitzilla: Bad Habit Tracker                       |
| Quit Smoking Today - quitcy                       | Qwit (Quit Smoking)                                |
| Quit Smoking Tracker                              | Redlight quit Smoking                              |
| Quit Smoking Tracker                              | Reveri                                             |
| Quit Smoking Tracker GOLD - stop smoking app      | Since - Day Counter & Tracker                      |
| Quit Smoking Virtual                              | Since iQuit                                        |
| Quit Smoking with AJ                              | *SiS - Smiling Instead of Smoking                  |
| Quit Smoking with Andrew Johnson                  | Smoke - quit                                       |
| Quit Smoking with Hypnosis                        | Smoke - quit Pro                                   |
| Quit Smoking with Quitify PRO                     | Smoke diary - cigarette counter                    |
| Quit Smoking, Be Smoke Free                       | Smoke Finance                                      |
| Quit Smoking, NeverSmoking                        | Smoke FREE - Non Smoking                           |
| Quit smoking. No bad Habits                       | *Smoke Free - quit smoking now                     |
| Quit Smoking. Stop Vaping Now                     | Smoke Free App                                     |
| Quit Smoking-App : Stop Smoking Cigarettes        | Smoke Free: Stop, Quit, No Smoking - Quit Tracker  |
| Quit Tobacco                                      | Smoke Meter                                        |
| Quit Tobacco                                      | Smoke Out: Tobacco Pirates                         |
| Quit Tracker: Stop Smoking                        | Smoke Timer - Quit Smoking                         |
| Quit: Hypnosis Program to Stop Smoking            | Smoke Watchers - Quit smoking                      |
| *QuitGuide - Quit Smoking                         | SmokeFree - quit smoking slowly                    |
| QuitNow! PRO - Stop Smoking                       | Smokefree 2 - Quit Smoking                         |
| QuitNow! Quit Smoking                             | Smokeless: Reduce or quit                          |
| Quitos - Quit Smoking                             | Smokenote Pro - Quit Smoking                       |
| Quitsmoke - Easily stop smoking                   | SmokeQuitter - The No-nonsense Cigarette iQuit App |
| QuitSmoke - Quit Smoking Now                      | *Smokerface                                        |
| *quitSTART - Quit Smoking                         | Smokers Diary                                      |
| QuitSure - Quit Smoking Smartly. No Cravings      | Smoking cessation Quit now Stop smoke hypnosis app |
| Quitzilla                                         | Smoking Counter & Stats                            |
| Qwidder: Quit Smoking                             | Smoking Less                                       |
| Qwit (Quit Smoking)                               | Smoking Log                                        |
| Redlights quit Smoking                            | Smoking Log - Stop Smoking                         |
| Reduce and Stop Smoking                           | Smoking Log Plus License                           |
| Reveri                                            | Smoking manager - Smokegram                        |
| Self discipline for willpower                     | Smoking Note                                       |
| Sharecare: Health & Well-being                    | Smokitten - Quit smoking !                         |

|                                                    |                                                    |
|----------------------------------------------------|----------------------------------------------------|
| Since - Day Counter & Tracker                      | SmoQuit - quit smoking                             |
| *SiS - Smiling Instead of Smoking                  | Sober Time - Sober Day Counter                     |
| Smoke - quit                                       | SoberBuddy: Addiction Recovery                     |
| Smoke - quit Pro                                   | SoberTool - Addiction Help                         |
| Smoke - quit Pro                                   | Sobriety Tracker Counter App                       |
| Smoke diary - Cigarette Counter                    | *Stay Quit Coach                                   |
| Smoke Finance                                      | Stop Cigarette                                     |
| Smoke FREE - Non Smoking                           | Stop Smoking - EasyQuit                            |
| Smoke FREE - quit smoking Plus                     | Stop Smoking - EasyQuit Pro                        |
| Smoke Free App                                     | Stop smoking - is an easy way to give up smoking   |
| *Smoke Free: Quit Smoking Now and Stop for good    | Stop Smoking - Quit Smoking                        |
| Smoke Free: Stop, Quit, No Smoking - Quit Tracker  | Stop Smoking - quit smoking, be smoke free         |
| Smoke Meter                                        | Stop Smoking Cessation Tracker                     |
| Smoke Out: Tobacco Pirates                         | Stop Smoking Cigarette Tracker                     |
| Smoke Revoke - Gradually Quit Smoking              | Stop Smoking Easy                                  |
| Smoke Timer - Quit Smoking                         | Stop Smoking in Two Weeks - With Hypnosis!         |
| Smoke Timer - Quite Smoking                        | Stop Smoking With Hypnosis Expert James Holmes     |
| Smoke Watchers - Quit Smoking                      | Stop Smoking: Simple Helper                        |
| SmoKefree - Quit smoking                           | Stop Tobacco Mobile Trainer                        |
| SmokeFree - quit smoking slowly                    | SWay: Quit or Less Smoking Timer Cigarette Tracker |
| SmokeFree Pro                                      | Tobacco - Quit Smoking                             |
| Smokeless: Reduce or quit smoking                  | Tobacco Free Teens                                 |
| Smokenote Pro - Quit Smoking                       | Tobacco Quiz                                       |
| SmokeQuitter - The No-nonsense Cigarette iQuit App | Tobano - quit smoking                              |
| Smoker Insight! -- A Smoker's LifeStyle Analyzer   | You Can Quit Smoking                               |
| *Smokerface                                        |                                                    |
| Smokers Diary                                      |                                                    |
| Smoker's diary                                     |                                                    |
| *smokeSCREEN game                                  |                                                    |
| Smoking Cessation Hypnosis                         |                                                    |
| Smoking cessation Quit now Stop smoke hypnosis app |                                                    |
| Smoking Counter & Stats                            |                                                    |
| Smoking Less                                       |                                                    |
| Smoking Log                                        |                                                    |
| Smoking Log - Stop Smoking                         |                                                    |
| Smoking Log Plus License - Stop Smoking            |                                                    |
| Smoking Manager - Smokegram                        |                                                    |
| Smoking Note                                       |                                                    |
| Smokitten - Quit Smoking                           |                                                    |

|                                                    |  |
|----------------------------------------------------|--|
| SmoQuit - quit smoking                             |  |
| Sobriety Tracker Counter App                       |  |
| *Stay Quit Coach Legacy                            |  |
| Stop Cigarette                                     |  |
| Stop Smoking - EasyQuit free                       |  |
| Stop Smoking - EasyQuit Pro                        |  |
| Stop smoking - is an easy way to give up smoking   |  |
| Stop Smoking - Quit Smoking                        |  |
| Stop Smoking - Quit Smoking & Healthy Life         |  |
| Stop Smoking - Quit Smoking Forever                |  |
| Stop Smoking - Quit Smoking Tracker                |  |
| Stop Smoking - quit smoking, be smoke free         |  |
| Stop Smoking / Quit Smoking / Quit Tracker         |  |
| Stop Smoking app - Quit Cigarette and Smoke Free   |  |
| Stop Smoking Easy                                  |  |
| Stop Smoking Hypnosis                              |  |
| Stop Smoking in Two Weeks - With Hypnosis!         |  |
| Stop smoking My quit coach app                     |  |
| Stop Smoking Personal Stories of Success Quit Now  |  |
| Stop Smoking with Hypnosis Expert James Holmes     |  |
| Stop Smoking: Simple Helper                        |  |
| StopSmoking - Quit cigarette smoking habits        |  |
| Streaks                                            |  |
| Streaks for Small Starts — Create healthy habits   |  |
| SWay: Quit or Less Smoking Timer Cigarette Tracker |  |
| tabac.io                                           |  |
| Tobacco - Quit Smoking                             |  |
| Tobacco Free Teens                                 |  |
| Tobacco Minus                                      |  |
| Tobacco Quiz                                       |  |
| Tobano - quit smoking                              |  |
| Well - Feel Better                                 |  |
| Without smoking                                    |  |
| You Can Quit Smoking                               |  |

Note: \* indicates app had published supporting study at the time of data collection.
